# Supplementary material for: Rethinking IL-1 Antagonism in Respiratory Viral Infections: A Role for IL-1 Signaling in the Development of Antiviral T Cell Immunity
Source: MDPI journal article supplement (doi:10.3390/ijms242115770), 2023-10-30
Supplement: s1 [file s1]

Supplementary Materials for

**Rethinking IL-1 antagonism in respiratory viral infections:  
A role for IL-1 signaling in the development of antiviral T cell immunity**

Bram Van Den Eeckhout, Marlies Ballegeer, Jozefien De Clercq, Elianne Burg, Xavier Saelens, Linos Vandekerckhove and Sarah Gerlo\*

\* Correspondence: Prof. Dr. Sarah Gerlo  
Corneel Heymanslaan 10, Medical Research Building (MRB) 2, Entrance 38, 9000 Ghent, Belgium  
[sarah.gerlo@ugent.be](mailto:sarah.gerlo@ugent.be)

**These Supplementary Materials include:**

- Supplementary Figures S1 – S6

**A**

BM-DC/OT-I CD8 T cell coculture experiments

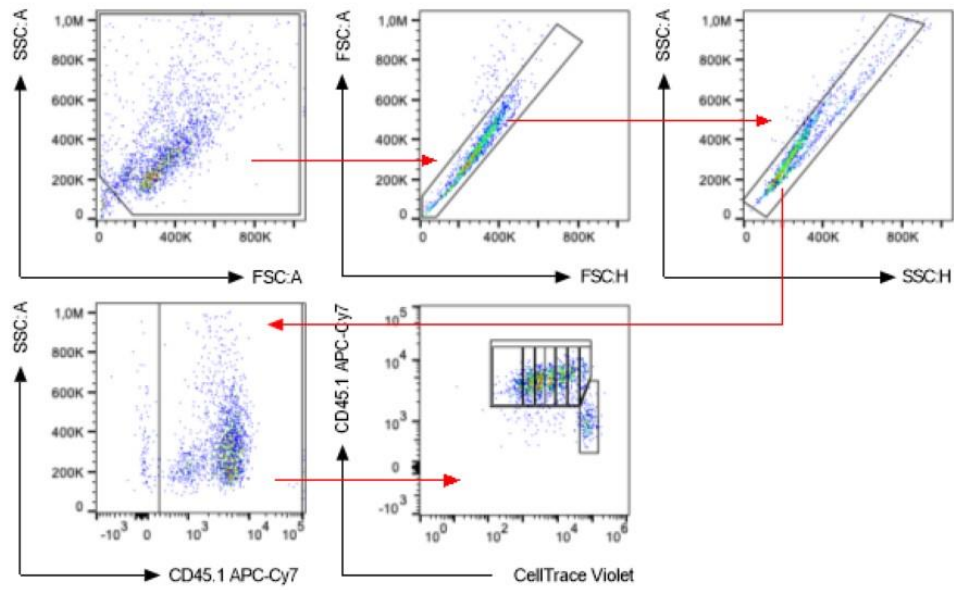**B**DC-OVA<sub>237-251</sub> experiments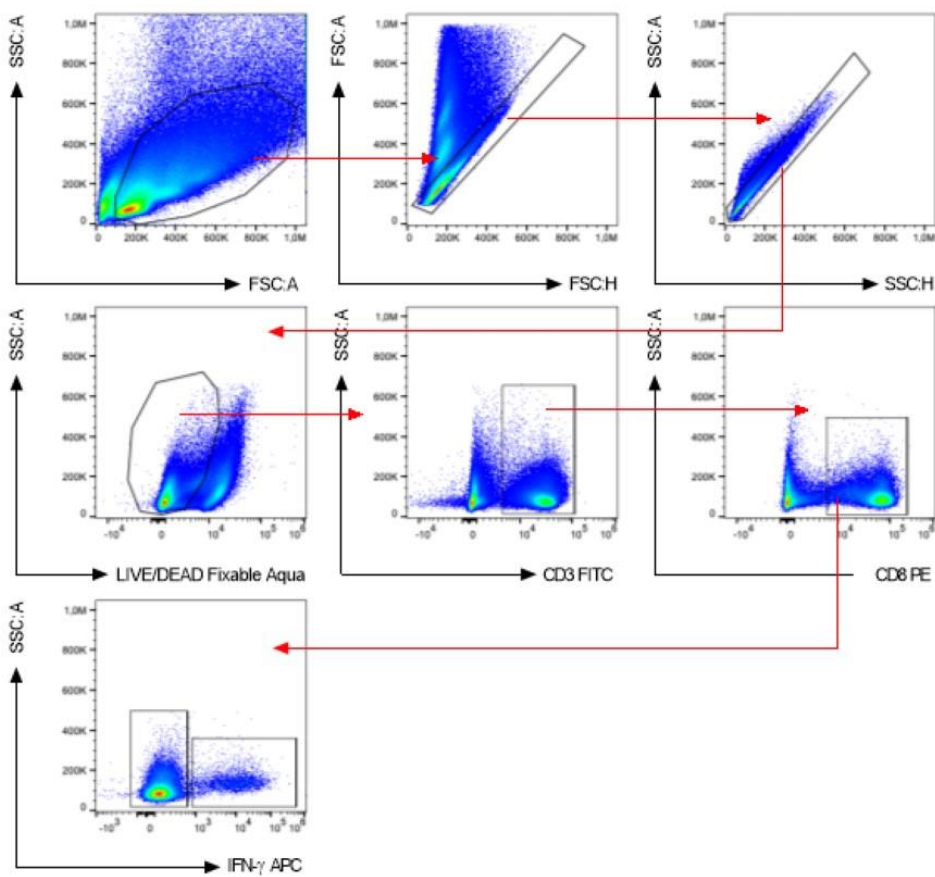

**Supplementary Figure S1.** (a) Gating strategy for the BM-DC/OT-I co-culture experiments. (b) Gating strategy for the *in vivo* DC-SIINFEKL immunization experiment.

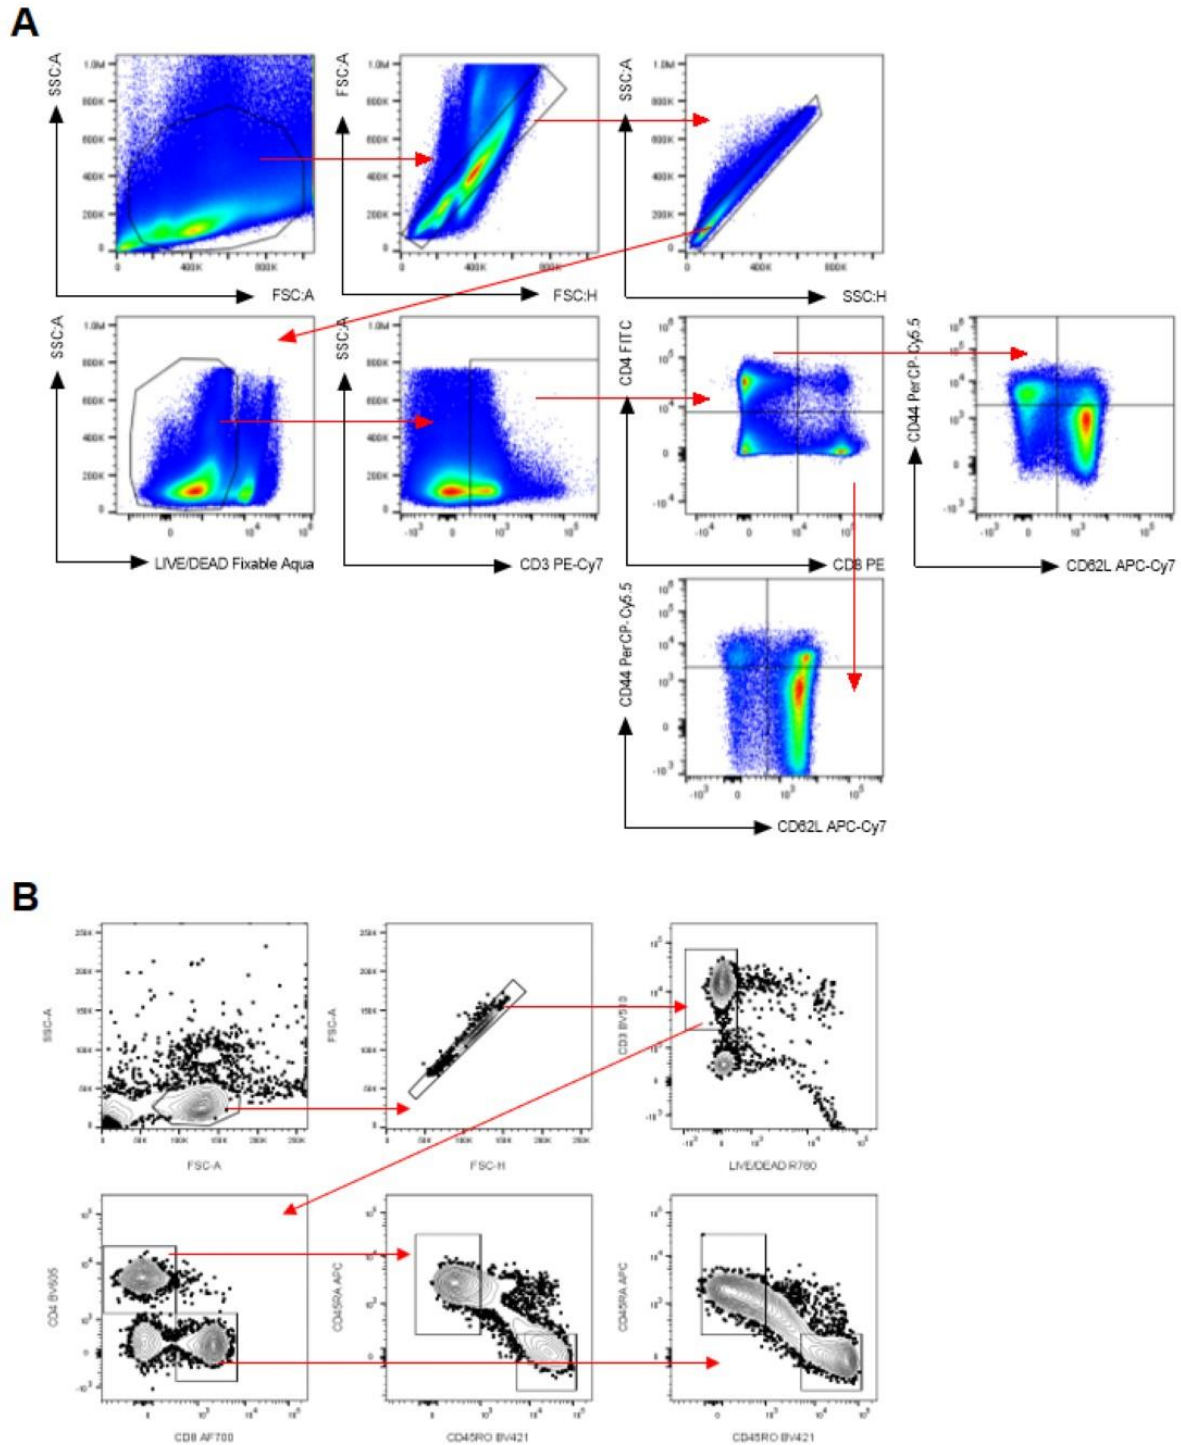

**Supplementary Figure S2.** (a) Gating strategy for the identification of CD4 and CD8 Tn cells and Tem cells for detection of IL-1R1 expression levels. (b) Gating strategy for the phosflow experiment on PBMCs.

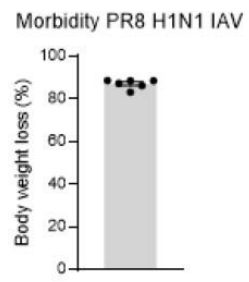

**Supplementary Figure S3.** Morbidity of PR8 IAV infection in C57BL/6 mice, assessed by body weight loss (%) 7 days post-inoculum.

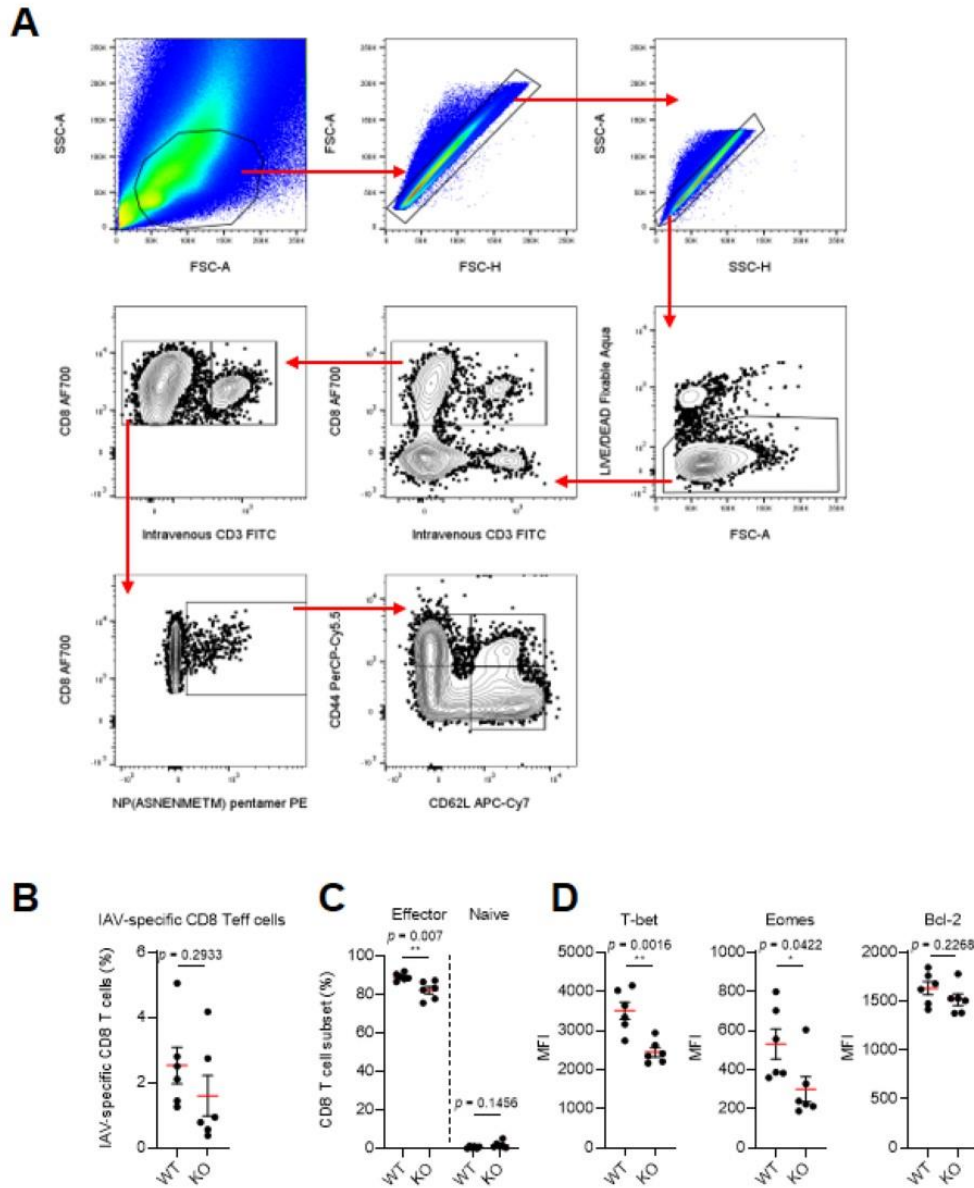

**Supplementary Figure S4.** (a) Gating strategy for the identification of antiviral CD8 Teff cells one week post-infection of WT and KO mice with PR8 IAV. (b) Frequencies of antiviral CD8 Teff cells within the total intravascular CD8 T cell population in lungs of WT and KO mice one week after PR8 IAV infection. (c) Frequencies of antiviral CD8 Teff cells that adopt an effector and a naive phenotype based on surface expression of CD44 and CD62L. (d) Expression of T-bet (*left*), Eomes (*middle*) and Bcl-2 (*right*) in antiviral CD8 Teff cells. The mean  $\pm$  SEM of an experiment with  $n = 6$  mice/group is shown. \*\*,  $p < 0.01$ ; \*,  $p < 0.05$ ; ns,  $p \geq 0.05$  by unpaired Student's  $t$ -test.

**A**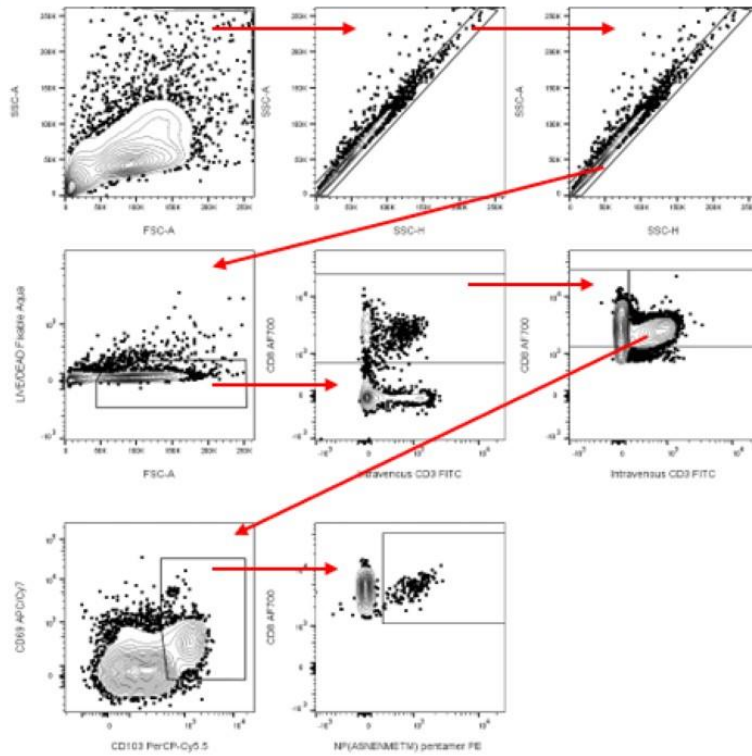**B**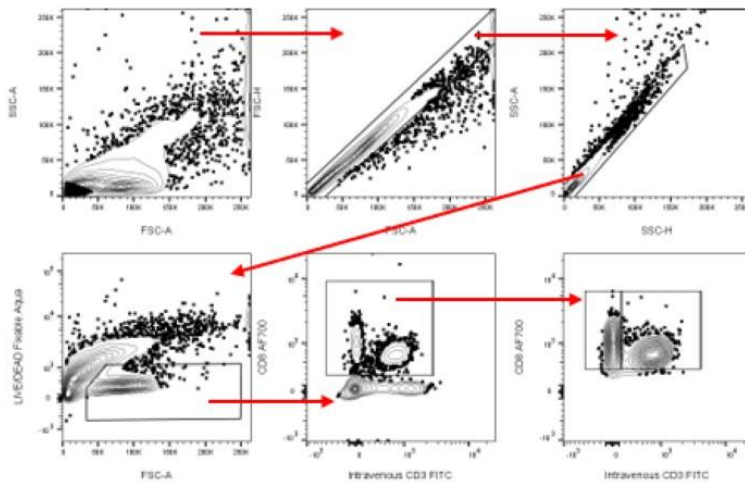**C**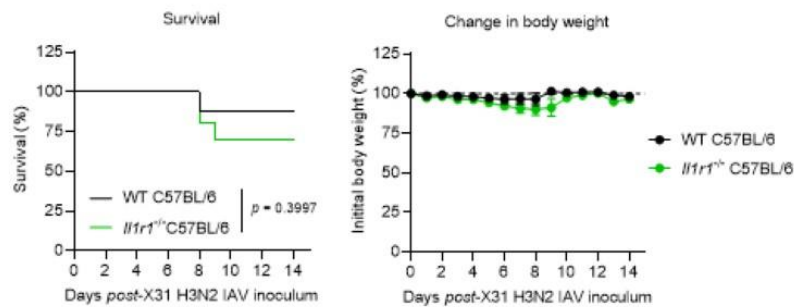

**Supplementary Figure S5. (a)** Gating strategy for the identification of antiviral CD8 Trm cells six weeks post-infection of WT and KO mice with PR8 IAV. **(b)** Gating strategy for the identification of polyfunctional CD8 Trm cells six weeks post-infection of WT and KO mice with PR8 IAV.

Representative image from lung single-cell suspensions stimulated for 6h *ex vivo* with PR8 IAV NP peptide pools. (c) Change in body weight over time of WT and KO mice challenged with a high inoculum (2xLD<sub>50</sub>) of X31 (H3N2) IAV. Mice were challenged six weeks after initial PR8 IAV infection and received a daily treatment with FTY720 (1 mg/kg) starting three days before X31 (H3N2) infection. Shown is a Kaplan–Meier curve of two independent experiments with  $n = 8 - 10$  mice combined. ns,  $p \geq 0.05$  by log-rank (Mantel-Cox) testing.

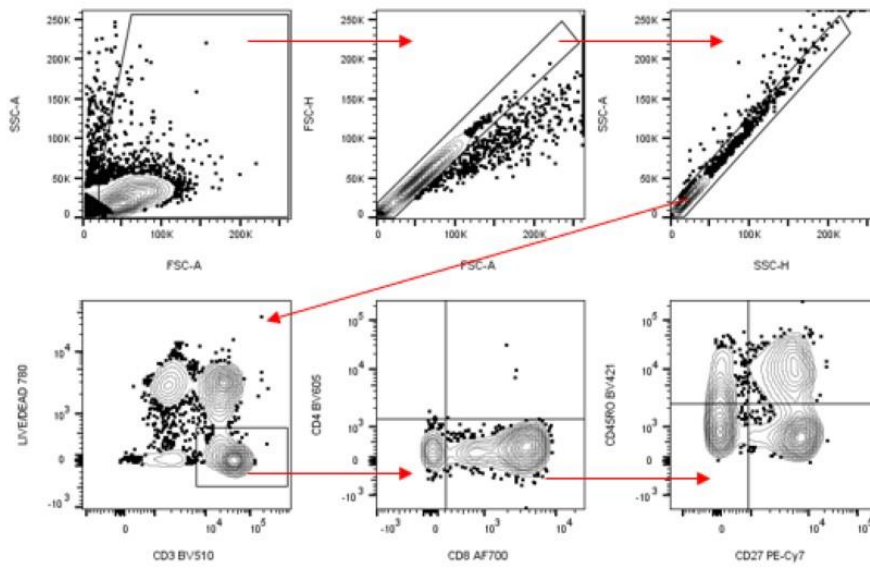

**Supplementary Figure S6.** Gating strategy for the human moDC/CD8 T cell co-culture experiment.
